# Supplementary material
Source: PubMed Central journal article supplement (PMC3911388)
Supplement: IAI.01141-13_zii999090489so1.pdf [file IAI.01141-13_zii999090489so1.pdf]

1 Supporting Information

2

3 Lim and Choi

4

5

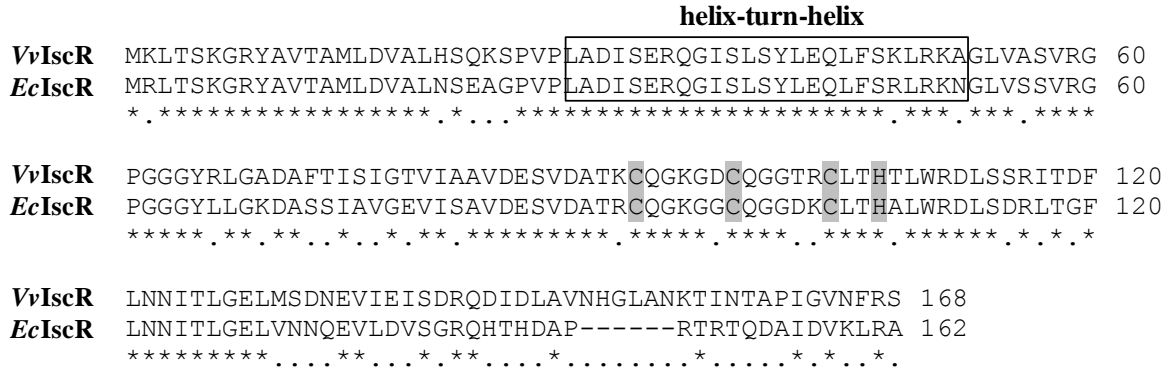

6

7 **Figure S1. Sequence analysis of IscR of *Vibrio vulnificus* and *Escherichia coli*.** Identical  
8 sequences are indicated with asterisks (\*), and dashed lines represent missing sequences.  
9 Conserved helix-turn-helix DNA binding motif (<http://www.uniprot.org/uniprot/Q8DEY6>) is  
10 indicated by open box. Three conserved cysteine residues (C92, C98, and C104) and one  
11 histidine residue (H107) (CCCH motif) which are essential for Fe-S cluster ligation are  
12 shaded in gray. Alignment was based on the amino acid sequences in the GenBank (NCBI)  
13 database and derived by the CLUSTALW alignment program  
14 (<http://www.ch.embnet.org/software/ClustalW.html>).

15

16 **TABLE S1. Oligonucleotides used for deletion of *iscR* and amplification of *iscR* coding**  
17 **region and promoter regions of the IscR target genes**

| Oligonucleotide <sup>a</sup> | Sequence (5' → 3') <sup>b</sup> | Use                                              |
|------------------------------|---------------------------------|--------------------------------------------------|
| ISCR001F                     | TTGTGCGCTGGTTGTCGGTT            | Deletion of <i>iscR</i>                          |
| ISCR001R                     | TAGGATCCCTCTAAGTAAGAGAGCGAAATC  |                                                  |
| ISCR002F                     | AGGGATCCTATTGATCTTGCGGTAAAT     | Deletion of <i>iscR</i>                          |
| ISCR002R                     | AGACTGCGCTGCATCGACGT            |                                                  |
| ISCR003F                     | CATATGAAACTGACATCTAAAGGAAGATAT  | Amplification of <i>iscR</i> ORF                 |
| ISCR003R                     | CTCGAGAGAGCGGAAATTTACAC         |                                                  |
| ISCR004F                     | AAGCTTAGTGTGGATACGGTGTGATATG    | Complementation of <i>iscR</i>                   |
| ISCR004R                     | TCTAGAGGCAGTTTCATTCTTCACTCC     |                                                  |
| FLGE01F                      | TCTGGTTCACTTCCACGA              | Amplification of the <i>flgE</i> promoter region |
| FLGE01R                      | TAACCTCTGCATTGCGTTCA            |                                                  |
| GBPA01F                      | CGCCTCATCGTTATTCTCAT            | Amplification of the <i>gbpA</i> promoter region |
| GBPA01R                      | GGCCAGTAAGTTTTTTGCGGTTG         |                                                  |

|          |                            |                                                          |
|----------|----------------------------|----------------------------------------------------------|
| VVHBA01F | GATAAAACAACAACGCCACATTAATC | Amplification of the <i>vvhBA</i> promoter region        |
| VVHBA01R | CTCGTAATGAGGAATCTATGCTTAAT |                                                          |
| PRX01F   | CACCCAGTAAATATTGTTTGGC     | Amplification of the <i>prx</i> promoter region          |
| PRX01R   | CTCAAGGCCAAACTTTACCTAA     |                                                          |
| ISCR01F  | GGTTGACGCAACTAAGTGTCAGG    | Amplification of a part of the <i>iscR</i> coding region |
| ISCR01R  | TTAAGAGCGGAAATTTACACCGAT   |                                                          |

18 <sup>a</sup> The oligonucleotides were designed using the genomic sequence of the *V. vulnificus* MO6-  
19 24/O (Park et al., 2011).

20 <sup>b</sup> Regions of oligonucleotides not complementary to corresponding genes are underlined.

21

22 TABLE S2. Oligonucleotides used for qRT-PCR

| Locus tag <sup>a</sup> | Oligonucleotide sequence (5' → 3') <sup>b</sup> |                           |
|------------------------|-------------------------------------------------|---------------------------|
|                        | Forward                                         | Reverse                   |
| VVMO6_00199            | ATGGAAGCGATTGAATACCTAA                          | GGAACTCTTGACCGACAG        |
| VVMO6_00216            | GAGCTTGTGGTGCAGGTG                              | ATGCCACATTGGTAAGGCCA      |
| VVMO6_00218            | GGTCAACGGAGTGCCAAAAC                            | ATCTTCTGGTTTGCGGTCGT      |
| VVMO6_00219            | CATCAAAGACAAAGGCAAGGTA                          | CGTAGAATCGCAGAGTGAAC      |
| VVMO6_00314            | AGTTGTGGCGGTGGATGGTG                            | GTGCCCCCTGGGGTTCATA       |
| VVMO6_00315            | TTGTGCTGACTCGTGCCCT                             | CATGCTGTCGTGGCATTGA       |
| VVMO6_00338            | GGTCAGCCATCGGTCTTTCA                            | TTGTCCATCTCGTGAGCACC      |
| VVMO6_00393            | GCGCGTAATAACGTCGGCAA                            | CGGCCACGAGTTCTTCATCG      |
| VVMO6_00423            | GAAACGTGGTTTGCCATGCT                            | AAAGCAAAACAATCCGCCCC      |
| VVMO6_00532            | CTCGCCTAGATGGCGTTGAT                            | ATGGAACGGATACGACGCTC      |
| VVMO6_00971            | TGGTATCGCTGGTCTATCTAT                           | TCACGGATTGGTTTCACTTT      |
| VVMO6_00997            | GGGAATGAGAGCAACCAGCG                            | CCGACGTGGTTTTGGCTGTT      |
| VVMO6_01063            | CCGATTACCCAGCCAATGGT                            | GCTTTTTGAACGCCATCGGT      |
| VVMO6_01074            | GGCAACAAGAGTATGAGTTTC                           | GCACAGACCACATCACAA        |
| VVMO6_01129            | ACCAAGCGCACAATGCCAGT                            | CGGCTTCAATGGCAGCATTTC     |
| VVMO6_01149            | CGCCATTGGGGTGGTCAGTA                            | GTCTTGCCGTGCTTGTGGC       |
| VVMO6_01150            | AGCTTTTGCGAACGCTGCAC                            | AGCGCACAAATACCAGCGGAA     |
| VVMO6_01249            | CTTTGAAACGGGCATCGCAG                            | AAACTCGGCGTAACGCGACA      |
| VVMO6_01954            | TGAAAGAGCAAGTCGACGCT                            | TTTGCCTTTTCCATTGCCCG      |
| VVMO6_02043            | CGAGCACCCAGAACTCACT                             | TCGTCAGTAACAACCGCGAA      |
| VVMO6_02138            | CAAGCCTTTAGCGATGAAA                             | CAGCAATAATCCTCTTCCAT      |
| VVMO6_02203            | GCAACAGAAGATGAGCATATC                           | GTCGCCAGAGGAACATAA        |
| VVMO6_02205            | GTGGTTTACACCTCAGGCCA                            | ACCACTGGCTTCCAATACCG      |
| VVMO6_02243            | CTGCTGACGAAGATGGAA                              | AATCACGAGATACGGAACC       |
| VVMO6_02433            | TGGATCCAAAAACGGTGCGT                            | TCCCATTTCATCCAACCAGCAA    |
| VVMO6_02434            | AGCATGGGGGCTAGAGCCTG                            | TCCGATGCGTGGTTTAGCGT      |
| VVMO6_02435            | CATTCTCGCAATACCACCATTC                          | ACGACAGTCATCCACCATCTCAC   |
| VVMO6_02436            | ATCAAACGCAGCCAAAGCACTC                          | GAAATCCGAGGTGAGCAGCAAAC   |
| VVMO6_02437            | TTAACAGAAACCGCAGCAAGTCG                         | TCACACCTAAACGCAAACCAACG   |
| VVMO6_02438            | GCAAAATCAAAGTAACGCCAGAAGG                       | GCAATCGCACTACCACAACCG     |
| VVMO6_02439            | TTGTTGAAGGTGAGTCGTTACTGATG                      | CGAGAGCACGCAATACATAAGAAGG |
| VVMO6_02440            | GATATGCGGTAACGGCAATGCT                          | TAAGAGAGCGAAATCCCCTGACG   |

|             |                        |                         |
|-------------|------------------------|-------------------------|
| VVMO6_02482 | ACAGATGAAGTTCGAGGCCGTG | GCTCGACGTGCATCAGGCTT    |
| VVMO6_02521 | ATCGGTTCTTTGAAGCGCC    | GGCTCGAGCGACCGTTTCTT    |
| VVMO6_02539 | AAGTGGCTATCGAAGCAGCA   | TCACGCTGTTGTTCTGGTGT    |
| VVMO6_03020 | AAGCGTGGATGGTGAGTA     | GGAAATGAAGAAAGAGAGAAAGC |
| VVMO6_03043 | GGCTCGTTTACGGTTTGGGG   | TGGCAGATGGTGTGGGTTCC    |
| VVMO6_03179 | GGCGACAGCATCAAGATCGG   | GGTGCTTCGCGCACCTCTAA    |
| VVMO6_03472 | TAAAGACGCAGCAGACAGCA   | AAACCTGCATTGACGTTGCC    |
| VVMO6_03494 | TAGACAAAGACGGCAGCTGCA  | CCCGCCGTGTACGAGCTCAA    |
| VVMO6_03502 | GGCAGGCCAAAACGAACAAT   | CCGCGACGTCTCTTAAGTCT    |
| VVMO6_03758 | TGTTGGCGATGCCTTTGCTT   | GAGCGATGCTCCCGTCACTG    |
| VVMO6_03816 | GTTTTGCCATCGCACGAACT   | TCGATGCCCAACTTGTACCC    |
| VVMO6_03848 | CAACAATGCCACGAAACGCA   | CCATGGCATCCACCACTCGT    |
| VVMO6_03878 | TCGACCGCTTGCATGTGATG   | CTGCGTTGCCTGCAATTTCC    |
| VVMO6_03880 | CACGCTGTTTAACGGCCAGC   | ATCACCACGGTGTACCGGA     |
| VVMO6_03881 | CGCCAAGAGCTTGGGTGCTA   | AGACACGGGCGCTTCGTACA    |
| VVMO6_04018 | TTTAAGGCGCGTGCAGAGTA   | GTCTTGGCTCTACTGCCGTT    |
| VVMO6_04141 | TGAAAGCCTGGGGTGAAGCA   | ATCGCGTAGCGTTGAGAGCG    |
| VVMO6_04152 | CGTTTGATCTCGCCGTTTG    | GCAGCCATCTCGCCTTTTGA    |
| VVMO6_04166 | GCCTTTTCGCCAATTGTGGT   | CCACAACACGGAGACGGTAA    |
| VVMO6_04170 | CTGCAAAATCGGCGGCATAG   | GCGAAGCGTGGCTTTGCTTA    |
| VVMO6_04184 | CGTCGCTAAAGCAGAGGCCA   | AAAGCGGCGGTAGGCTCATC    |
| VVMO6_04185 | TGACGCAGCAATCTCAGCGA   | GCAAATGACACGAAAGCCGC    |
| VVMO6_04186 | GGCCAATACTGCGCTGGTG    | CGCGAATGGTCTGAGAAGCG    |
| VVMO6_04222 | ATCACCCGCGAAAGCTACAA   | TTGAAGCAAAGCAGACCCGC    |
| VVMO6_04284 | CTACACGCTAGAAGGCATC    | CGAATTTCAAGACCCACAC     |
| VVMO6_04286 | GCGGTACTCTTACCCTCAC    | AGACGAACATCACGGCAACT    |
| VVMO6_04436 | CGTGAAATCGGAACTTGGCG   | CGAGTGTGGCAGTTTGGTG     |
| VVMO6_04467 | CCAAACATGGCGCTCGCTAC   | GTTAAACCGGGGCTGATGGC    |
| VVMO6_04468 | CCCATTTTGTGCTCGCGTTC   | GAGGGCTTGGCCGTCATTTT    |
| VVMO6_04469 | CCCGGCGTTTATACCGATGA   | TGGAACACTGGGTGCGATAC    |
| VVMO6_04473 | GACGCGATCAAGATTGGCAC   | AGCTCTTCAACGCTGCTGAT    |
| VVMO6_04475 | GCAACGGCACTTATGTCTA    | GAGTAGGTCATCGCATCG      |
| VVMO6_04488 | TGTCAGTCGGTATGGTCA     | GGGTATCCTGCGTGATTC      |
| VVMO6_04555 | CCGTGGTGGTGGTGCTCAAT   | TGGCGGTTTGATTTCCCCTT    |

23 <sup>a</sup> Locus tags are based on the database for the *V. vulnificus* MO6-24/O genome, which was  
24 retrieved from GenBank (accession number CP002469 and CP002470).

25 <sup>b</sup> The oligonucleotides were designed using the genomic sequence of the *V. vulnificus* MO6-  
26 24/O (Park et al., 2011).

27

28 TABLE S3. Genes whose expression is up-regulated by IscR<sup>a</sup>

| Locus tag | Product name | Microarray                               |         | qRT-PCR                                  |         |
|-----------|--------------|------------------------------------------|---------|------------------------------------------|---------|
|           |              | Mean Log <sub>2</sub> ratio <sup>b</sup> | P-value | Mean Log <sub>2</sub> ratio <sup>b</sup> | P-value |

**Transport and metabolism**

|             |                                                                                  |        |          |        |          |
|-------------|----------------------------------------------------------------------------------|--------|----------|--------|----------|
| VVMO6_00199 | Aspartate ammonia-lyase                                                          | -1.047 | 7.51E-03 | -1.310 | 2.60E-05 |
| VVMO6_00314 | Argininosuccinate synthase                                                       | -2.515 | 8.63E-03 | -3.520 | 1.01E-04 |
| VVMO6_00315 | Argininosuccinate lyase                                                          | -1.622 | 2.64E-03 | -2.373 | 1.68E-05 |
| VVMO6_00338 | Glucose-6-phosphate isomerase                                                    | -1.221 | 1.81E-03 | -1.697 | 1.69E-04 |
| VVMO6_00393 | Ornithine carbamoyltransferase                                                   | -1.732 | 9.09E-03 | -1.552 | 4.37E-05 |
| VVMO6_01954 | Cob(I)alamin adenosyltransferase                                                 | -1.184 | 4.83E-06 | -1.007 | 2.96E-04 |
| VVMO6_03020 | Na <sup>+</sup> /H <sup>+</sup> antiporter NhaD type                             | -1.214 | 5.06E-05 | -1.040 | 2.33E-05 |
| VVMO6_03043 | Putrescine/proton symporter, Putrescine/ornithine antiporter PotE                | -1.548 | 1.28E-02 | -1.717 | 1.40E-04 |
| VVMO6_03179 | Argininosuccinate synthase                                                       | -1.304 | 5.93E-03 | -2.177 | 1.45E-03 |
| VVMO6_03816 | Ribonucleotide reductase of class III (anaerobic) large subunit                  | -1.561 | 1.23E-02 | -4.070 | 2.84E-06 |
| VVMO6_04184 | Arginine ABC transporter ATP-binding protein ArtP                                | -1.162 | 2.60E-02 | -1.437 | 7.28E-05 |
| VVMO6_04185 | Arginine ABC transporter periplasmic arginine-binding protein ArtI               | -3.511 | 4.15E-03 | -3.520 | 1.44E-05 |
| VVMO6_04186 | Arginine ABC transporter permease ArtQ                                           | -2.482 | 8.15E-03 | -3.393 | 3.01E-05 |
| VVMO6_04222 | Tryptophanase                                                                    | -1.152 | 2.75E-02 | -2.483 | 1.99E-05 |
| VVMO6_04284 | Acetylornithine deacetylase                                                      | -1.498 | 1.26E-02 | -7.083 | 7.79E-07 |
| VVMO6_04467 | Dehydrogenases with different specificities (short-chain alcohol dehydrogenases) | -1.727 | 1.04E-07 | -2.213 | 1.07E-04 |
| VVMO6_04473 | Ascorbate-specific PTS system, EIIA component                                    | -1.548 | 1.63E-03 | -3.480 | 8.15E-04 |
| VVMO6_04488 | Sulfate permease                                                                 | -1.427 | 3.51E-05 | -1.307 | 4.12E-03 |

**Energy production and conversion**

|             |                                                                  |        |          |        |          |
|-------------|------------------------------------------------------------------|--------|----------|--------|----------|
| VVMO6_00216 | Fumarate reductase subunit D                                     | -1.224 | 4.17E-02 | -4.873 | 1.48E-07 |
| VVMO6_00218 | Succinate dehydrogenase flavoprotein subunit                     | -1.231 | 7.04E-03 | -5.377 | 5.25E-06 |
| VVMO6_00219 | Succinate dehydrogenase flavoprotein subunit                     | -1.130 | 1.38E-02 | -5.583 | 1.85E-07 |
| VVMO6_00971 | Pyruvate formate-lyase                                           | -1.392 | 2.18E-03 | -2.690 | 1.25E-04 |
| VVMO6_01074 | D-Lactate dehydrogenase                                          | -2.245 | 4.53E-06 | -2.380 | 1.54E-05 |
| VVMO6_02043 | Alcohol dehydrogenase; Acetaldehyde dehydrogenase                | -1.114 | 1.80E-03 | -3.347 | 3.78E-03 |
| VVMO6_02203 | Pyridine nucleotide-disulfide oxidoreductase; NADH dehydrogenase | -1.152 | 3.38E-02 | -1.600 | 1.81E-04 |
| VVMO6_03472 | Alcohol dehydrogenase                                            | -1.704 | 7.85E-03 | -9.143 | 3.03E-05 |
| VVMO6_03502 | Cytochrome c553                                                  | -1.149 | 8.31E-05 | -1.967 | 2.10E-05 |
| VVMO6_04166 | L-Lactate permease                                               | -1.014 | 4.28E-05 | -1.973 | 1.24E-03 |
| VVMO6_04170 | D-Lactate dehydrogenase, Fe-S protein, FAD/FMN-containing        | -1.099 | 1.10E-03 | -2.143 | 3.40E-05 |
| VVMO6_04469 | 2,4-Dienoyl-CoA reductase                                        | -2.133 | 1.75E-06 | -1.758 | 1.82E-04 |
| VVMO6_04475 | Hydrolase                                                        | -1.548 | 2.21E-04 | -2.810 | 9.34E-05 |

**Virulence**

|             |                                          |        |          |        |          |
|-------------|------------------------------------------|--------|----------|--------|----------|
| VVMO6_03494 | N-acetylglucosamine-binding protein GbpA | -1.690 | 1.76E-05 | -1.300 | 7.84E-04 |
| VVMO6_03880 | Cytolysin secretion protein VvhB         | -2.133 | 3.30E-04 | -2.367 | 5.42E-06 |
| VVMO6_03881 | Cytolysin / Hemolysin VvhA               | -1.966 | 1.27E-03 | -2.467 | 2.39E-06 |

**Oxidative stress**

|             |                |        |          |        |          |
|-------------|----------------|--------|----------|--------|----------|
| VVMO6_04141 | Peroxioredoxin | -2.344 | 1.51E-08 | -3.157 | 8.40E-05 |
| VVMO6_04468 | Glutaredoxin 2 | -2.506 | 2.01E-07 | -1.738 | 6.73E-05 |

**Cell motility and chemotaxis**

|             |                                        |        |          |        |          |
|-------------|----------------------------------------|--------|----------|--------|----------|
| VVMO6_02263 | Flagellar hook protein FlgE            | -1.003 | 2.12E-04 | -1.277 | 5.24E-03 |
| VVMO6_01129 | Methyl-accepting chemotaxis protein II | -1.015 | 3.04E-05 | -1.117 | 5.39E-04 |

|                                              |                                                            |        |          |        |          |
|----------------------------------------------|------------------------------------------------------------|--------|----------|--------|----------|
| VVMO6_01149                                  | Signal transduction histidine kinase                       | -1.685 | 8.56E-03 | -4.653 | 3.63E-05 |
| VVMO6_01150                                  | Signal transduction protein CheY                           | -2.184 | 4.58E-03 | -4.697 | 9.51E-06 |
| VVMO6_03848                                  | Methyl-accepting chemotaxis protein I                      | -1.139 | 1.44E-03 | -1.383 | 1.28E-04 |
| VVMO6_03878                                  | Methyl-accepting chemotaxis protein HylB                   | -1.377 | 3.63E-03 | -2.440 | 3.41E-04 |
| VVMO6_04555                                  | Signal transduction protein CheW                           | -1.635 | 1.99E-04 | -1.403 | 2.38E-03 |
| <b>Translation</b>                           |                                                            |        |          |        |          |
| VVMO6_02205                                  | Endoribonuclease L-PSP                                     | -1.092 | 1.05E-03 | -1.583 | 4.29E-05 |
| VVMO6_02482                                  | Ribosome hibernation protein YfiA                          | -1.123 | 3.23E-05 | -5.473 | 3.77E-06 |
| <b>Replication, recombination and repair</b> |                                                            |        |          |        |          |
| VVMO6_00423                                  | A/G-specific adenine glycosylase                           | -1.544 | 1.50E-04 | -1.247 | 6.24E-04 |
| <b>Function unknown</b>                      |                                                            |        |          |        |          |
| VVMO6_00997                                  | Hypothetical protein                                       | -1.366 | 1.42E-05 | -1.040 | 9.19E-05 |
| VVMO6_01063                                  | Hypothetical protein                                       | -1.003 | 8.20E-04 | -2.277 | 1.19E-05 |
| VVMO6_02138                                  | Hypothetical protein                                       | -2.737 | 7.64E-06 | -4.887 | 1.47E-03 |
| VVMO6_02243                                  | <i>N</i> -acetylglucosamine-regulated outer membrane porin | -1.308 | 3.70E-05 | -1.340 | 2.19E-02 |
| VVMO6_03758                                  | Hypothetical protein                                       | -1.411 | 8.68E-05 | -4.663 | 6.32E-04 |
| VVMO6_04286                                  | Hypothetical protein                                       | -2.184 | 1.67E-03 | -7.127 | 2.88E-04 |

29 <sup>a</sup>Locus tag numbers, functional categories, and annotation of gene products are based on the  
30 database of the *V. vulnificus* MO6-24/O genome (Park et al., 2011; GenBank accession  
31 CP002469 and CP002470). Functional categories in boldface are shown above the first gene  
32 in each category.

33 <sup>b</sup>The M value represents the log<sub>2</sub> ratio of mRNA expression of each gene in the *iscR* mutant  
34 versus the parental wild type. The values shown are the mean from three independent  
35 experiments. The genes with  $M \geq 1.0$  or  $M \leq -1.0$  (expression ratios of  $\geq 2.0$ ,  $P \leq 0.05$ ) were  
36 considered as the IscR regulon. Negative numbers show up-regulation by IscR.

37  
38  
39

TABLE S4. Genes whose expression is down-regulated by IscR<sup>a</sup>

| Product name                            | Microarray                                                 |         | qRT-PCR                                  |         |          |
|-----------------------------------------|------------------------------------------------------------|---------|------------------------------------------|---------|----------|
|                                         | Mean Log <sub>2</sub> ratio <sup>b</sup>                   | P-value | Mean Log <sub>2</sub> ratio <sup>b</sup> | P-value |          |
| <b>Fe-S cluster biogenesis</b>          |                                                            |         |                                          |         |          |
| VVMO6_02433                             | Hypothetical protein                                       | 2.821   | 1.48E-07                                 | 3.300   | 1.86E-05 |
| VVMO6_02434                             | Ferredoxin (Fdx)                                           | 3.537   | 4.17E-07                                 | 3.313   | 3.60E-05 |
| VVMO6_02435                             | Chaperone protein HscA                                     | 3.163   | 2.27E-07                                 | 3.037   | 1.81E-06 |
| VVMO6_02436                             | Chaperone protein HscB                                     | 3.690   | 3.74E-07                                 | 3.047   | 3.54E-05 |
| VVMO6_02437                             | Iron binding protein IscA for iron-sulfur cluster assembly | 3.032   | 6.47E-07                                 | 2.963   | 1.02E-04 |
| VVMO6_02438                             | Iron-sulfur cluster assembly scaffold protein IscU         | 3.637   | 8.81E-09                                 | 2.813   | 6.28E-04 |
| VVMO6_02439                             | Cysteine desulfurase IscS subfamily                        | 3.413   | 8.01E-08                                 | 3.710   | 1.08E-06 |
| VVMO6_02440                             | Iron-sulfur cluster regulator IscR <sup>c</sup>            | 6.043   | 2.65E-07                                 | 4.310   | 1.77E-06 |
| <b>Energy production and conversion</b> |                                                            |         |                                          |         |          |

|                                       |                                       |       |          |       |          |
|---------------------------------------|---------------------------------------|-------|----------|-------|----------|
| VVMO6_00532                           | Pyruvate dehydrogenase E1 component   | 1.209 | 3.71E-02 | 1.910 | 1.29E-03 |
| VVMO6_02539                           | Pyruvate formate-lyase                | 1.140 | 1.05E-05 | 1.630 | 3.56E-06 |
| <b>Signal transduction mechanisms</b> |                                       |       |          |       |          |
| VVMO6_01249                           | Diguanylate cyclase                   | 1.249 | 1.44E-04 | 1.087 | 1.49E-05 |
| VVMO6_02521                           | VpsR family transcriptional regulator | 1.441 | 3.76E-03 | 1.413 | 6.29E-05 |
| <b>Membrane protein</b>               |                                       |       |          |       |          |
| VVMO6_04018                           | Outer membrane protein A              | 1.938 | 7.03E-04 | 3.683 | 3.62E-05 |
| <b>Function unknown</b>               |                                       |       |          |       |          |
| VVMO6_04152                           | Hypothetical protein                  | 2.846 | 3.52E-07 | 3.380 | 2.23E-05 |
| VVMO6_04436                           | Hypothetical protein                  | 1.156 | 5.33E-03 | 2.710 | 3.71E-03 |

40 <sup>a</sup>Locus tag numbers, functional categories, and annotation of gene products are based on the  
41 database of the *V. vulnificus* MO6-24/O genome (Park et al., 2011; GenBank accession  
42 CP002469 and CP002470). Functional categories in boldface are shown above the first gene  
43 in each category.

44 <sup>b</sup>The M value represents the log<sub>2</sub> ratio of mRNA expression of each gene in the *iscR* mutant  
45 versus the parental wild type. The values shown are the mean from three independent  
46 experiments. The genes with  $M \geq 1.0$  or  $M \leq -1.0$  (expression ratios of  $\geq 2.0$ ,  $P \leq 0.05$ ) were  
47 considered as the IscR regulon. Positive numbers show down-regulation by IscR.

48 <sup>c</sup> The probe (in microarray) and a set of primers (in qRT-PCR) used for the *iscR* gene  
49 (VVMO6\_02440) expression analysis were designed to hybridize to the *iscR* coding region  
50 upstream from the deletion site of the *iscR* mutant.

51

52

### 53 **References**

- 54 1. **Park JH, Cho YJ, Chun J, Seok YJ, Lee JK, Kim KS, Lee KH, Park SJ, Choi SH.**  
55 2011. Complete genome sequence of *Vibrio vulnificus* MO6-24/O. *J. Bacteriol.*  
56 **193**:2062-2063.
